# Supplementary material for: Movement Sonification Techniques to Improve Balance in Parkinson’s Disease: A Pilot Randomized Controlled Trial
Source: MDPI journal article supplement (doi:10.3390/brainsci13111586), 2023-11-12

# SONICWALK

## OPERATIONAL FRAMEWORK

### SENSORS CALIBRATION

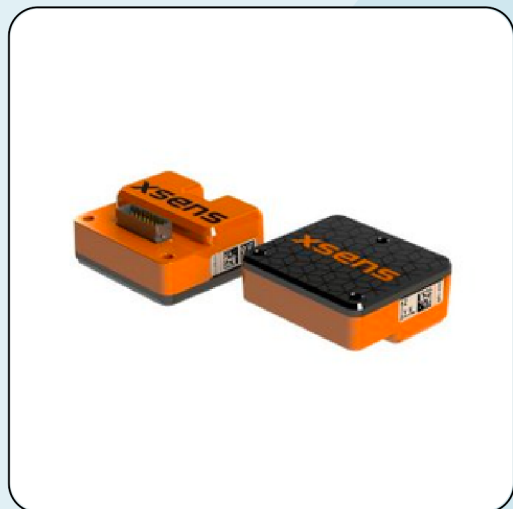

**2 Xsens inertial sensors**, positioned one per leg at the ankle (Xsens Technologies B.V., The Netherlands)

Cadence is calculated during the initial phase of sensors calibration, where the patient is asked to walk normally.

### MOTION DATA ANALYSIS

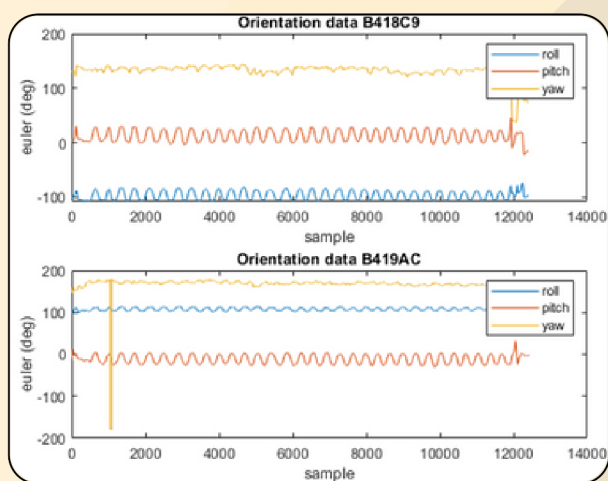

**Motion Data Retrieved from the sensors:**

instantaneous angular position detection related to the knee joint.

### DATA PROCESSING

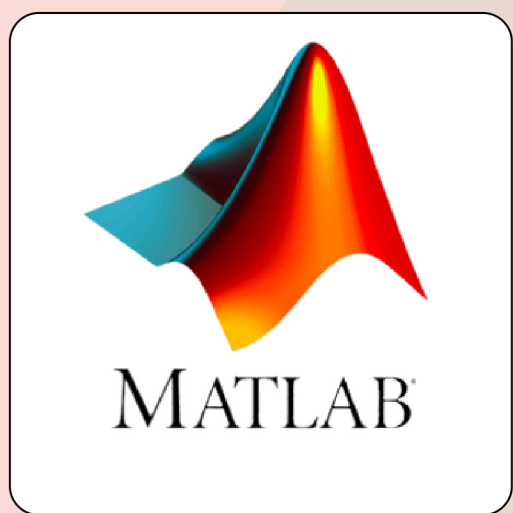

**Processing:**

- 1) Foot strike detection, step cadence calculation.
- 2) Association of sounds with movements (sonification) using a specific algorithm.

### SONIFICATION EXAMPLE

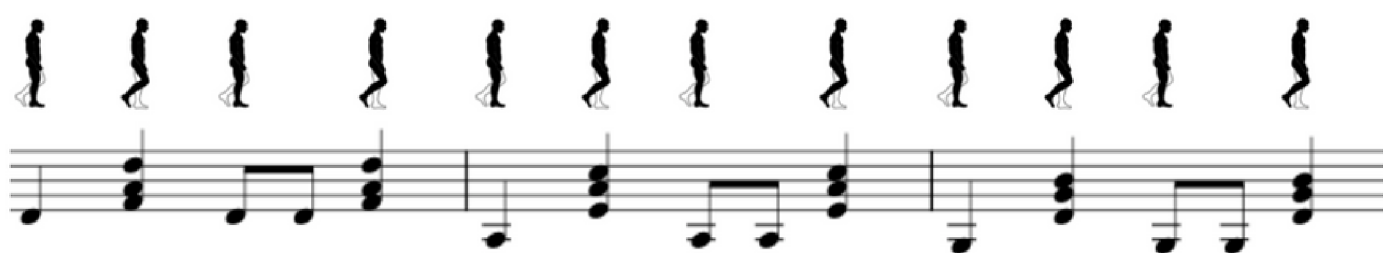

Supplement: s1 [file s1]
